# Supplementary material for: Efficient dehydrogenation of a formic acid–ammonium formate mixture over Au3Pd1 catalyst
Source: Royal Society of Chemistry journal article supplement (doi:10.1039/c8ra09534e), 2019-01-01
Supplement: c8ra09534e1.pdf [file c8ra09534e1.pdf]

Supporting information for

**Efficient dehydrogenation of formic acid-ammonium formate mixture over  
Au<sub>3</sub>Pd<sub>1</sub> catalyst**

Xiao-Tong Guo, Juan Zhang, Jian-Chao Chi, Zhi-Hui Li, Yu-Chen Liu, Xin-Ru Liu,  
Shu-Yong Zhang<sup>\*a</sup>

School of Chemistry and Chemical Engineering, Shandong University, Jinan 250100,  
P. R. China.

\*Corresponding author: [syzhang@sdu.edu.cn](mailto:syzhang@sdu.edu.cn)

## S1. Calculation methods:

(1) The turnover of frequency (TOF) is calculated based on the amount of Pd and Au atoms in the catalyst using the following equation:

$$\text{TOF} = \frac{pV / RT}{n_{\text{Pd+Au}} t}$$

where  $p$  is the atmospheric pressure,  $V$  is the volume of  $\text{H}_2$  measured at standard temperature and pressure (STP),  $R$  is the universal gas constant,  $T$  is the absolute temperature,  $n_{\text{Pd+Au}}$  is the mole number of Pd and Au in the catalyst, and  $t$  is the reaction time.

(2) The content of  $\text{NH}_3$  is calculated as follows:

$$x_{\text{NH}_3} = \frac{m \times 25 \times 22.4 \times 1000}{14.01 V_{\text{CO}_2 + \text{H}_2}}$$

Where  $x_{\text{NH}_3}$  is the  $\text{NH}_3$  content in ppm,  $m$  (mg/L) is the concentration of N in the diluted  $\text{H}_2\text{SO}_4$  solution, 14.01 is the relative atomic mass of N, 22.4 is the standard molar volume of ideal gases at STP.

The content of  $\text{NH}_3$  reported in the text was based on three experimental results. The measurement of  $\text{NH}_3$  content was based on the relevant standards (GB/T 18204.25—2000, HJ 535—2009).

## S2. TEM images for the AuPd/C catalysts.

Fig. S1 TEM images and particle size distribution of the newly prepared (A)  $\text{Au}_{0.5}\text{Pd}_1/\text{C}$ , (B)  $\text{Au}_1\text{Pd}_1/\text{C}$ , (C)  $\text{Au}_2\text{Pd}_1/\text{C}$ , (D)  $\text{Au}_4\text{Pd}_1/\text{C}$  and (E)  $\text{Au}_5\text{Pd}_1/\text{C}$  catalysts.

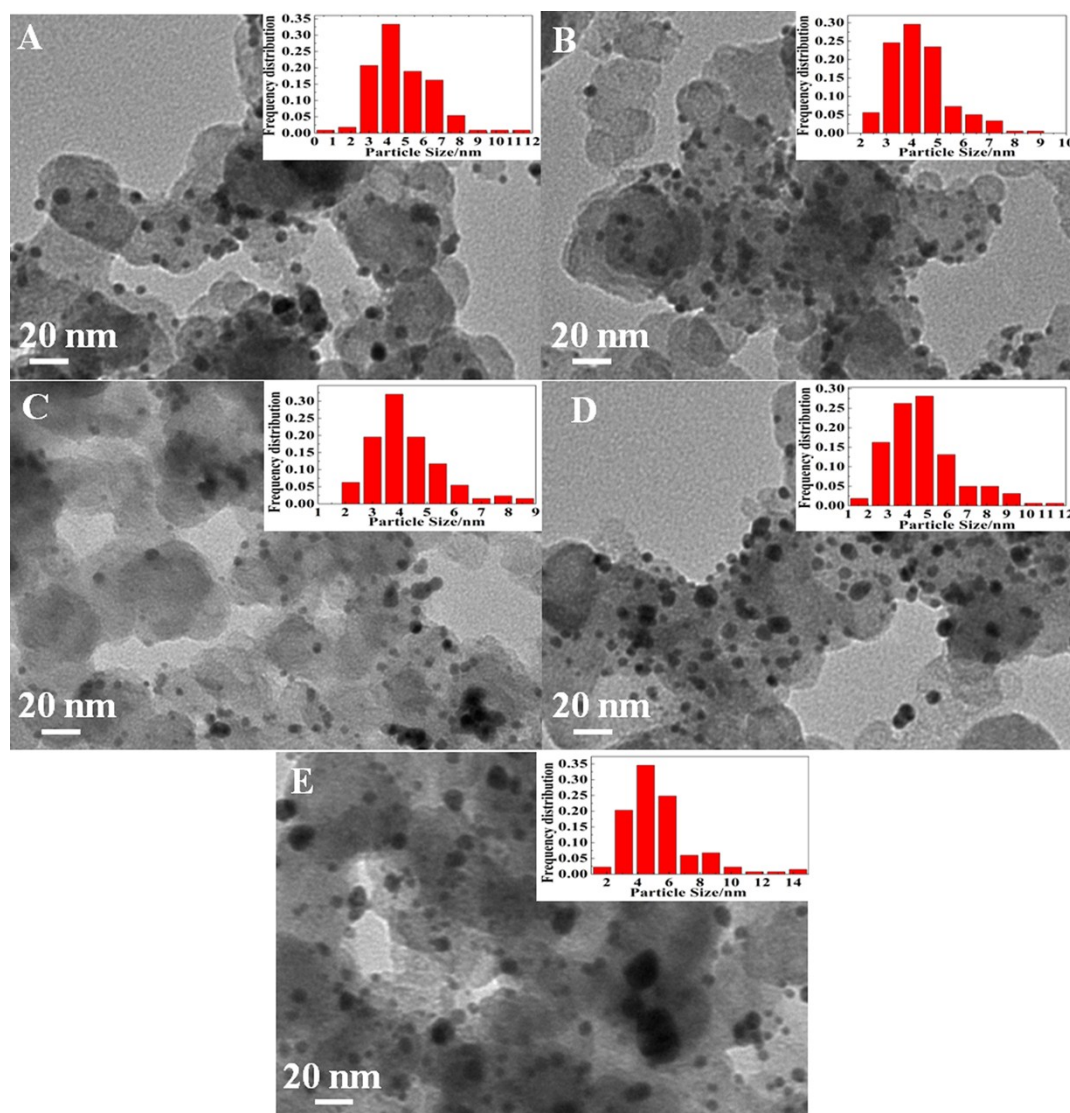

The mean particle sizes of the  $\text{Au}_{0.5}\text{Pd}_1/\text{C}$ ,  $\text{Au}_1\text{Pd}_1/\text{C}$ ,  $\text{Au}_2\text{Pd}_1/\text{C}$ ,  $\text{Au}_4\text{Pd}_1/\text{C}$  and  $\text{Au}_5\text{Pd}_1/\text{C}$  catalysts were 4.86, 4.29, 4.25, 4.78 and 5.33 nm, respectively.

Fig. S2 TEM images and particle size distribution of the recovered Au<sub>3</sub>Pd<sub>1</sub>/C catalysts after the 2<sup>nd</sup> run (A) and 4<sup>th</sup> run (B).

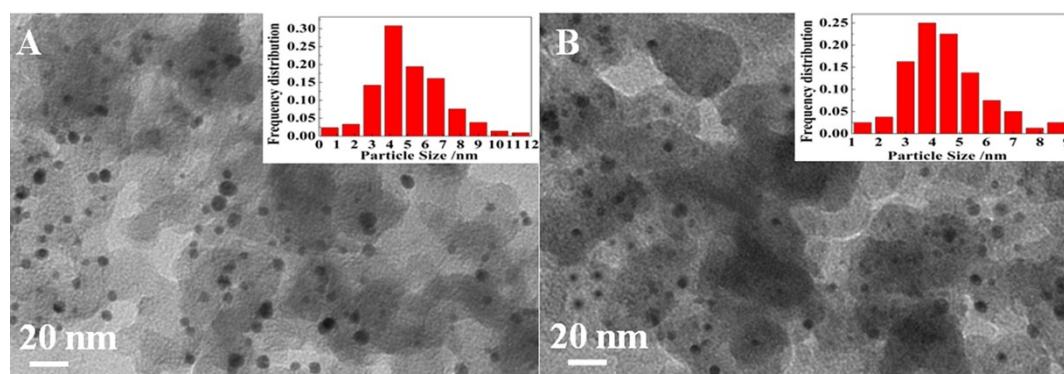

### S3. Composition analysis for the AuPd/C catalysts.

Table S1. ICP results for the composition of the AuPd/C catalysts.

| Catalyst                             | Metal content (wt%)    | Atom ratio (Au/Pd) |
|--------------------------------------|------------------------|--------------------|
| Au <sub>0.5</sub> Pd <sub>1</sub> /C | Au, 22.37%; Pd, 25.70% | 0.47               |
| Au <sub>1</sub> Pd <sub>1</sub> /C   | Au, 34.42%; Pd, 19.36% | 0.96               |
| Au <sub>2</sub> Pd <sub>1</sub> /C   | Au, 43.30%; Pd, 12.14% | 1.93               |
| Au <sub>3</sub> Pd <sub>1</sub> /C   | Au, 48.23%; Pd, 8.70%  | 2.99               |
| Au <sub>4</sub> Pd <sub>1</sub> /C   | Au, 50.47%; Pd, 7.06%  | 3.86               |
| Au <sub>5</sub> Pd <sub>1</sub> /C   | Au, 52.88%; Pd, 5.93%  | 4.82               |

Table S2. XPS results for the content of metal on the surface of AuPd/C catalysts.

| Catalyst                             | Atomic %             | Atom ratio (Au/Pd) |
|--------------------------------------|----------------------|--------------------|
| Au <sub>0.5</sub> Pd <sub>1</sub> /C | Au, 1.17%; Pd, 1.95% | 0.6                |
| Au <sub>1</sub> Pd <sub>1</sub> /C   | Au, 1.85%; Pd, 1.89% | 0.98               |
| Au <sub>2</sub> Pd <sub>1</sub> /C   | Au, 2.38%; Pd, 1.46% | 1.63               |
| Au <sub>3</sub> Pd <sub>1</sub> /C   | Au, 0.74%; Pd, 0.31% | 2.39               |
| Au <sub>4</sub> Pd <sub>1</sub> /C   | Au, 1.84%; Pd, 0.76% | 2.42               |
| Au <sub>5</sub> Pd <sub>1</sub> /C   | Au, 2.23%; Pd, 0.85% | 2.62               |

#### S4. Hydrogen generation over the Pd/C, Au/C, Au<sub>3</sub>Pd<sub>1</sub>/C catalysts.

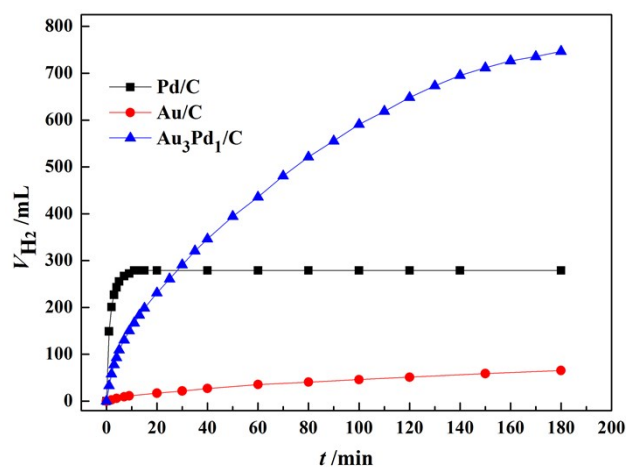

Fig. S3 H<sub>2</sub> generation from 10 mL mixture with 3 mol/L FA and 3 mol/L AF over 60 mg of Pd/C, Au/C, Au<sub>3</sub>Pd<sub>1</sub>/C catalysts at 365 K.

#### S5. XPS spectrum of the Au<sub>3</sub>Pd<sub>1</sub>/C catalyst.

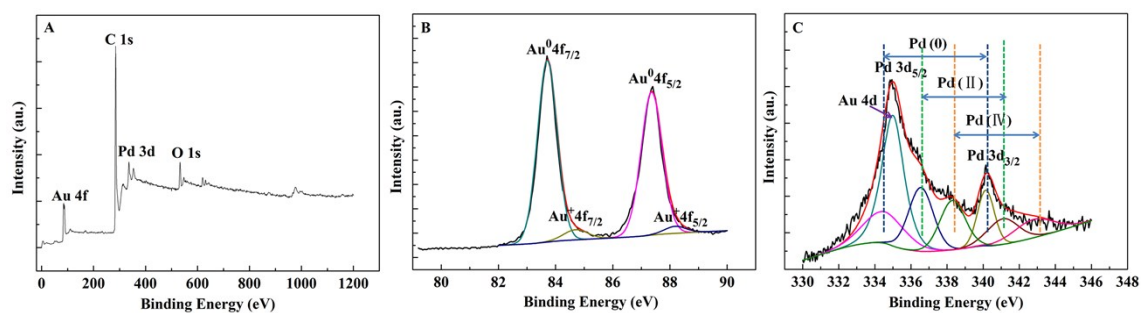

Fig. S4(A) XPS spectrum of the Au<sub>3</sub>Pd<sub>1</sub>/C catalyst; high-resolution XPS spectrum of (B) Au 4f and (C) Pd 3d in the Au<sub>3</sub>Pd<sub>1</sub>/C catalyst.

## S6. Detailed information for the dehydrogenation of FA-AF mixture.

Table S3. The maximum volume of H<sub>2</sub>, initial TOF for the first 10 min, decomposition efficiency of FA ( $\eta_{FA}$ ) and AF ( $\eta_{AF}$ ) for 0.02 mol of FA-AF mixture at different concentrations.

| $c_{FA+AF}/\text{mol/L}$ | $V_{H_2}/\text{mL}$ | Initial TOF/h <sup>-1</sup> | $\eta_{FA}/\%$ | $\eta_{AF}/\%$ |
|--------------------------|---------------------|-----------------------------|----------------|----------------|
| 2                        | 310                 | 145.1                       | 100            | 38.4           |
| 4                        | 330                 | 227.8                       | 100            | 47.3           |
| 6                        | 330                 | 269.6                       | 100            | 47.3           |
| 8                        | 307                 | 293.1                       | 100            | 37.1           |
| 10                       | 315                 | 312.2                       | 100            | 40.6           |

## S7. Comparison of activation energies of various catalysts.

Table S4. Comparison of activation energies of various catalysts for dehydrogenation of FA.

| Catalysts                                                                 | Ea (KJ/mol) | Ref        |
|---------------------------------------------------------------------------|-------------|------------|
| PtRuBiO <sub>x</sub> /C                                                   | 37.3        | [1]        |
| Au/ZrO <sub>2</sub>                                                       | 49.3        | [2]        |
| Au <sub>41</sub> Pd <sub>59</sub> /C                                      | 28±2        | [3]        |
| (Co <sub>3</sub> ) <sub>E</sub> Au <sub>0.6</sub> Pd <sub>0.4</sub> /rGO  | 39.77       | [4]        |
| Ag <sub>10</sub> Pd <sub>90</sub> /0.2CND/SBA-15                          | 43.2        | [5]        |
| Pd <sub>0.5</sub> Au <sub>0.3</sub> Mn <sub>0.2</sub> /N-SiO <sub>2</sub> | 26.2        | [6]        |
| Au <sub>0.75</sub> Pd <sub>0.25</sub> /C-L-7.5                            | 42.23       | [7]        |
| 5 wt% Pd/C                                                                | 39          | [8]        |
| Au <sub>3</sub> Pd <sub>1</sub> /C                                        | 23.3±1.3    | this study |

### S8. GC spectrum of the released gas.

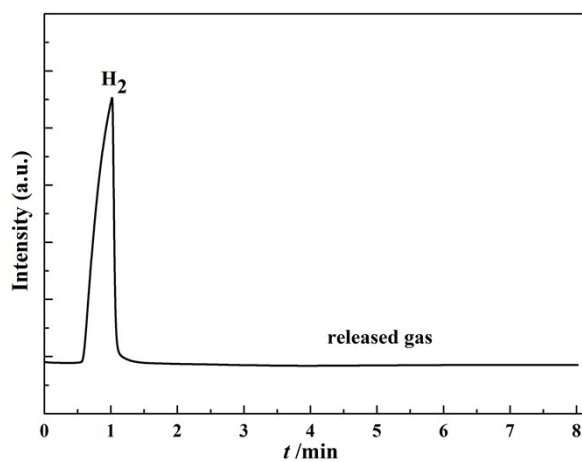

Fig. S5 GC spectrum using TCD for the released gas from 5 mL mixture with 5 mol/L FA and 7.5 mol/L AF over the  $Au_3Pd_1/C$  catalyst at 365 K.

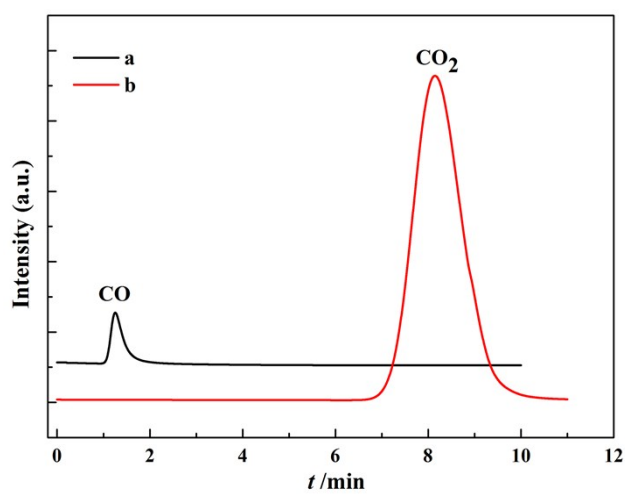

Fig. S6 GC spectrum using FID-Methanator for the (a) pure CO and (b) released gas from 5 mL mixture with 5 mol/L FA and 7.5 mol/L AF over the  $Au_3Pd_1/C$  catalyst at 365 K. The detection limit of CO is 5 ppm.

### S9. The content of NH<sub>3</sub> from the released gas.

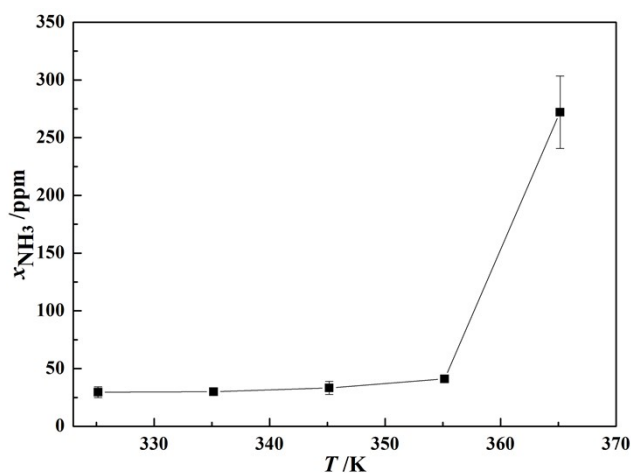

Fig. S7 The content of NH<sub>3</sub> from the released gas from 5 mL mixture with 5 mol/L FA and 7.5 mol/L AF at different temperatures over the Au<sub>3</sub>Pd<sub>1</sub>/C catalyst. The theoretical conversion of FA in each case is 10%.

### S10 Notes and references

- 1 S. W. Ting, S. A. Cheng, K. Y. Tsang, N. van der Laak and K. Y. Chan, *Chem. Commun.*, 2009, 7333-7335.
- 2 Q. Y. Bi, X. L. Du, Y. M. Liu, Y. Cao, H. Y. He and K. N. Fan, *J. Am. Chem. Soc.*, 2012, 134, 8926-8933.
- 3 O. Metin, X. L. Sun and S. H. Sun, *Nanoscale*, 2013, 5, 910-912.
- 4 X. C. Yang, P. Pachfule, Y. Chen, N. Tsumori and Q. Xu, *Chem. Commun.*, 2016, 52, 4171-4174.
- 5 L. Xu, B. Jin, J. Zhang, D. G. Cheng, F. Q. Chen, Y. An, P. Cui and C. Wan, *RSC Adv.*, 2016, 6, 46908-46914.



- 6 Y. Karatas, A. Bulut, M. Yurderi, I. E. Ertas, O. Alal, M. Gulcan, M. Celebi, H. Kivrak, M. Kaya and M. Zahmakiran, *Appl. Catal. B: Environ.*, 2016, 180, 586-595.
- 7 J. Cheng, X. J. Gu, X. L. Sheng, P. L. Liu and H. Q. Su, *J. Mater. Chem. A*, 2016, 4, 1887-1894.
- 8 F. Sanchez, D. Motta, A. Roldan, C. Hammond, A. Villa and N. Dimitratos, *Top. Catal.*, 2018, 61, 254-266.
